# Supplementary material
Source: ML conference proceedings conference paper supplement (https://openaccess.thecvf.com/content/ICCV2021/html/Pan_Scalable_Vision_Transformers_ICCV_2021_paper.html)
Supplement: Supplementary file 1 [file Pan_Scalable_Vision_Transformers_ICCV_2021_supplemental.pdf]

# Supplementary Material: Scalable Vision Transformers with Hierarchical Pooling

Zizheng Pan Bohan Zhuang\* Jing Liu Haoyu He Jianfei Cai  
Dept of Data Science and AI, Monash University

We organize our supplementary material as follows.

- In Section 1, we elaborate on the components of a Transformer block, including the multi-head self-attention layer (MSA) and the position-wise multi-layer perceptron (MLP).
- In Section 2, we provide details for the FLOPs calculation of a Transformer block.

## 1. Transformer Block

### 1.1. Multi-head Self-Attention

Let  $\mathbf{X} \in \mathbb{R}^{N \times D}$  be the input sentence, where  $N$  is the sequence length and  $D$  the embedding dimension. First, a self-attention layer computes query, key and value matrices from  $\mathbf{X}$  using linear transformations

$$[\mathbf{Q}, \mathbf{K}, \mathbf{V}] = \mathbf{X} \mathbf{W}_{qkv}, \quad (\text{A})$$

where  $\mathbf{W}_{qkv} \in \mathbb{R}^{D \times 3D_h}$  is a learnable parameter and  $D_h$  is the dimension of each self-attention head. Next, the attention map  $\mathbf{A}$  can be calculated by scaled inner product from  $\mathbf{Q}$  and  $\mathbf{K}$  and normalized by a softmax function

$$\mathbf{A} = \text{Softmax}(\mathbf{Q} \mathbf{K}^\top / \sqrt{D_h}), \quad (\text{B})$$

where  $\mathbf{A} \in \mathbb{R}^{N \times N}$  and  $A_{ij}$  represents for the attention score between the  $\mathbf{Q}_i$  and  $\mathbf{K}_j$ . Then, the self-attention operation is applied on the value vectors to produce an output matrix

$$\mathbf{O} = \mathbf{A} \mathbf{V}, \quad (\text{C})$$

where  $\mathbf{O} \in \mathbb{R}^{N \times D_h}$ . For a multi-head self-attention layer with  $D/D_h$  heads, the outputs can be calculated by a linear projection for the concatenated self-attention outputs

$$\mathbf{X}' = [\mathbf{O}_1; \mathbf{O}_2; \dots; \mathbf{O}_{D/D_h}] \mathbf{W}_{proj}, \quad (\text{D})$$

where  $\mathbf{W}_{proj} \in \mathbb{R}^{D \times D}$  is a learnable parameter and  $[\cdot]$  denotes the concatenation operation.

### 1.2. Position-wise Multi-Layer Perceptron

Let  $\mathbf{X}'$  be the output from the MSA layer. An MLP layer which contains two fully-connected layers with a GELU non-linearity can be represented by

$$\mathbf{X} = \text{GELU}(\mathbf{X}' \mathbf{W}_{fc1}) \mathbf{W}_{fc2}, \quad (\text{E})$$

where  $\mathbf{W}_{fc1} \in \mathbb{R}^{D \times 4D}$  and  $\mathbf{W}_{fc2} \in \mathbb{R}^{4D \times D}$  are learnable parameters.

---

\*Corresponding author. Email: bohan.zhuang@monash.edu

## 2. FLOPs of a Transformer Block

We denote  $\phi(n, d)$  as a function of FLOPs with respect to the sequence length  $n$  and the embedding dimension  $d$ . For an MSA layer, The FLOPs mainly comes from four parts: (1) The projection of  $\mathbf{Q}, \mathbf{K}, \mathbf{V}$  matrices  $\phi_{qkv}(n, d) = 3nd^2$ . (2) The calculation of the attention map  $\phi_A(n, d) = n^2d$ . (3) The self-attention operation  $\phi_O(n, d) = n^2d$ . (4) And finally, a linear projection for the concatenated self-attention outputs  $\phi_{proj}(n, d) = nd^2$ . Therefore, the overall FLOPs for an MSA layer is

$$\begin{aligned}\phi_{MSA}(n, d) &= \phi_{qkv}(n, d) + \phi_A(n, d) + \phi_O(n, d) + \phi_{proj}(n, d) \\ &= 3nd^2 + n^2d + n^2d + nd^2 \\ &= 4nd^2 + 2n^2d.\end{aligned}\tag{F}$$

For an MLP layer, the FLOPs mainly comes from two fully-connected (FC) layers. The first FC layer  $fc1$  is used to project each token from  $\mathbb{R}^d$  to  $\mathbb{R}^{4d}$ . The next FC layer  $fc2$  projects each token back to  $\mathbb{R}^d$ . Therefore, the FLOPs for an MLP layer is

$$\phi_{MLP}(n, d) = \phi_{fc1}(n, d) + \phi_{fc2}(n, d) = 4nd^2 + 4nd^2 = 8nd^2.\tag{G}$$

By combining Eq. (F) and Eq. (G), we can get the total FLOPs of one Transformer block

$$\phi_{BLK}(n, d) = \phi_{MSA}(n, d) + \phi_{MLP}(n, d) = 12nd^2 + 2n^2d.\tag{H}$$
